# Supplementary material for: Genetic Monitoring of the Captive Population of the Critically Endangered Brazilian Merganser (Mergus octosetaceus)
Source: MDPI journal article supplement (doi:10.3390/birds5010013), 2024-03-13
Supplement: s1 [file s1]

# Genetic monitoring of the captive population of the critically endangered Brazilian Merganser (*Mergus octosetaceus*)

Davidson P. Campos<sup>1</sup>, Henry P. Granger-Neto<sup>1</sup>, José E. Santos-Júnior<sup>1</sup>, Renata S. O. Buzatti<sup>1</sup>, Fabrício R. Santos<sup>1\*</sup>

<sup>1</sup> Department of Genetics, Ecology and Evolution, Instituto de Ciências Biológicas, Universidade Federal de Minas Gerais, Belo Horizonte, Minas Gerais, Brazil

\* Correspondence: fsantos@icb.ufmg.br; Tel.: +(55)3134092581, FRS

## Supplementary Materials

### Figures

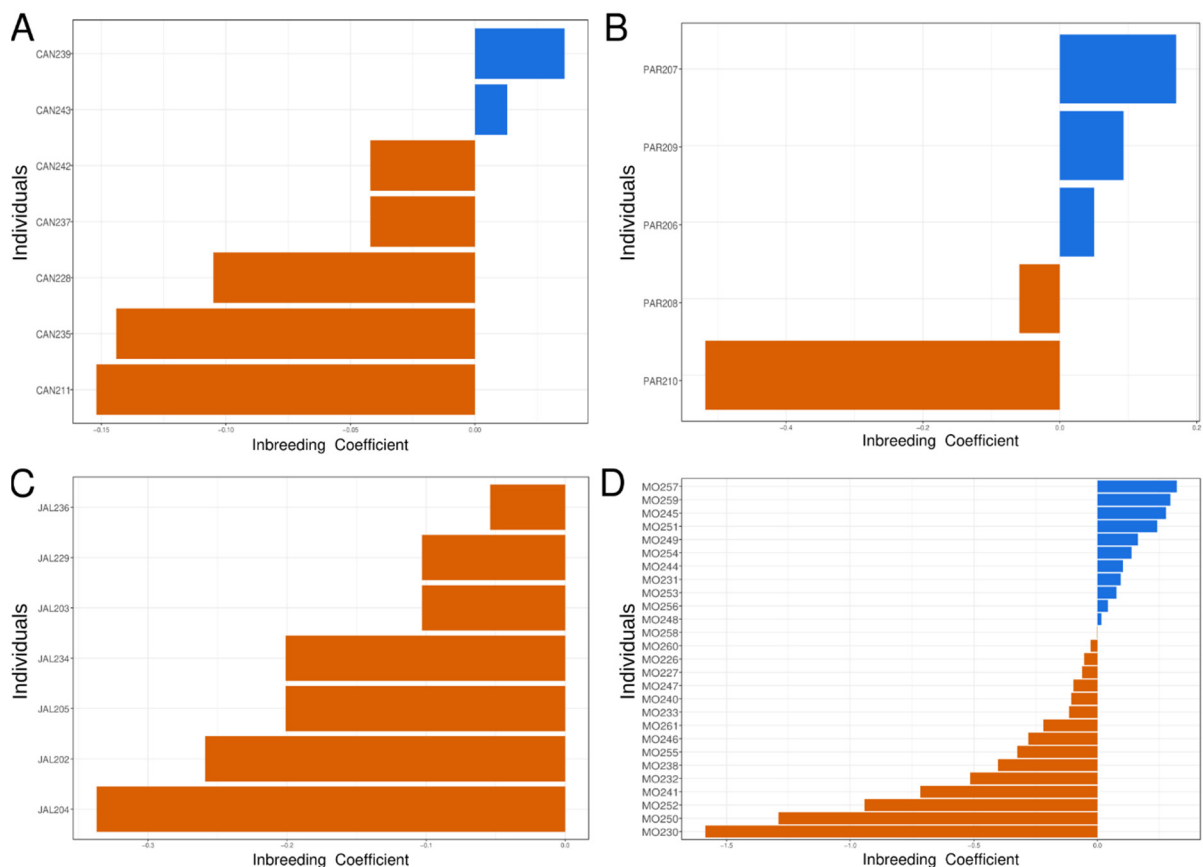

**Figure S1.** Inbreeding coefficients for the four subdivisions of the captive population of Brazilian Merganser: **A** – Serra da Canastra National Park (Canastra - CAN) individuals; **B** – Alto Paranaíba region (Paranaíba - PAR) individuals; **C** – Jalapão State Park (Jalapão - JAL) individuals; **D** – Captive-bred individuals (MO) individuals.

# Generation

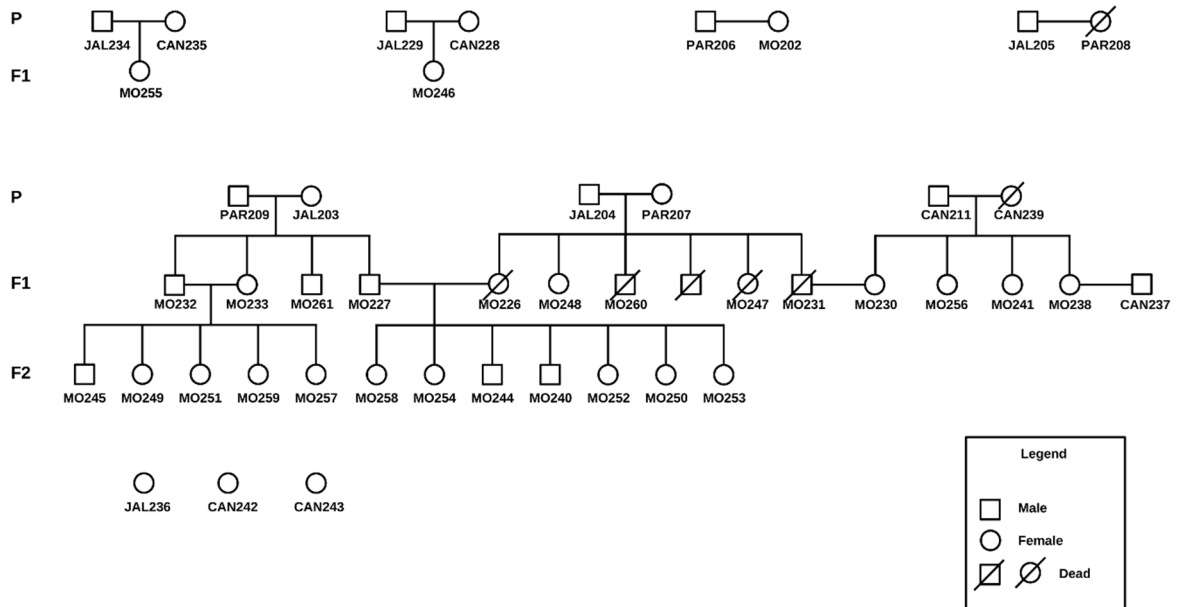

**Figure S2.** Pedigree of individuals from the *ex situ* population of Brazilian Merganser. Individuals are labeled with sample numbers: MO (captive-bred individuals derived from *ex situ* crossings), CAN (from Canastra region), PAR (from Alto Paranaíba region), and JAL (from Jalapão State Park). CAN, PAR and JAL individuals are the founders of this *ex situ* population.

## Tables

**Table S1.** List of samples used in this work.

| Individuals | Origin    | Reads    | Present_loci | Average<br>depth of<br>coverage | Frequency_<br>missing loci* |
|-------------|-----------|----------|--------------|---------------------------------|-----------------------------|
| JAL202      | Jalapão   | 1195968  | 21806        | 53.32                           | 0.39                        |
| JAL203      | Jalapão   | 1699213  | 21390        | 75.43                           | 0.4                         |
| JAL204      | Jalapão   | 1134441  | 19495        | 52.58                           | 0.45                        |
| JAL205      | Jalapão   | 625129   | 15808        | 34.89                           | 0.55                        |
| PAR206      | Paranaíba | 1713969  | 20109        | 79.33                           | 0.43                        |
| PAR207      | Paranaíba | 1499821  | 21441        | 66.93                           | 0.4                         |
| PAR208      | Paranaíba | 466157   | 15378        | 26.97                           | 0.57                        |
| PAR209      | Paranaíba | 2005642  | 20594        | 90.65                           | 0.42                        |
| PAR210      | Paranaíba | 1069332  | 19055        | 51.65                           | 0.46                        |
| CAN211      | Canastra  | 2133359  | 21189        | 95.32                           | 0.4                         |
| MO226       | Captivity | 1364027  | 18966        | 65.5                            | 0.47                        |
| MO227       | Captivity | 1275949  | 17837        | 65.52                           | 0.5                         |
| CAN228      | Canastra  | 846324   | 17027        | 44.05                           | 0.52                        |
| JAL229      | Jalapão   | 630868   | 16186        | 33.69                           | 0.54                        |
| MO230       | Captivity | 4405580  | 25212        | 182.92                          | 0.29                        |
| MO231       | Captivity | 1966384  | 20495        | 91.51                           | 0.42                        |
| MO232       | Captivity | 706231   | 19161        | 33.36                           | 0.46                        |
| MO233       | Captivity | 693680   | 17267        | 35.51                           | 0.51                        |
| JAL234      | Jalapão   | 1970681  | 20752        | 90.48                           | 0.42                        |
| CAN235      | Canastra  | 980387   | 17550        | 49.24                           | 0.51                        |
| JAL236      | Jalapão   | 1266070  | 18381        | 64.02                           | 0.48                        |
| CAN237      | Canastra  | 2641404  | 21972        | 122.91                          | 0.38                        |
| MO238       | Captivity | 1919106  | 20385        | 90.79                           | 0.43                        |
| CAN239      | Canastra  | 1327781  | 19295        | 65.67                           | 0.46                        |
| MO240       | Captivity | 512261   | 15069        | 28.97                           | 0.58                        |
| MO241       | Captivity | 1579876  | 19992        | 75.89                           | 0.44                        |
| CAN242      | Canastra  | 1358351  | 18337        | 68.79                           | 0.48                        |
| CAN243      | Canastra  | 2693056  | 22035        | 125.35                          | 0.38                        |
| MO244       | Captivity | 2729312  | 21679        | 129.83                          | 0.39                        |
| MO245       | Captivity | 19044767 | 19742        | 94.16                           | 0.45                        |
| MO246       | Captivity | 1283030  | 16729        | 69.14                           | 0.53                        |
| MO247       | Captivity | 1750366  | 19627        | 85.62                           | 0.45                        |
| MO248       | Captivity | 841464   | 17650        | 49.36                           | 0.51                        |
| MO249       | Captivity | 2127977  | 21167        | 98.91                           | 0.41                        |

|       |           |         |       |        |      |
|-------|-----------|---------|-------|--------|------|
| MO250 | Captivity | 4424525 | 23392 | 198.17 | 0.33 |
| MO251 | Captivity | 2886368 | 20831 | 140.95 | 0.41 |
| MO252 | Captivity | 668985  | 18724 | 32.4   | 0.47 |
| MO253 | Captivity | 1374798 | 19388 | 67.45  | 0.45 |
| MO254 | Captivity | 1822056 | 19926 | 87.31  | 0.44 |
| MO255 | Captivity | 1820240 | 19401 | 91.03  | 0.45 |
| MO256 | Captivity | 952460  | 21827 | 42.97  | 0.39 |
| MO257 | Captivity | 2552464 | 24502 | 109.95 | 0.31 |
| MO258 | Captivity | 2295233 | 21572 | 104.47 | 0.39 |
| MO259 | Captivity | 547169  | 17095 | 29.27  | 0.52 |
| MO260 | Captivity | 487416  | 16694 | 24.93  | 0.52 |
| MO261 | Captivity | 808756  | 19083 | 38.19  | 0.46 |

---

\*The frequency of missing loci shown in this table refers to the result after Stacks filtering. The final data, after vcftools filtering does not show missing data

**Table S2.** Number of SNPs in heterozygosity. INDV = individual; O(HOM) = observed number of SNPs in homozygosity; O(HET) = observed number of SNPs in heterozygosity; F = inbreeding coefficient. The expected homozygosity was 305.5, the expected heterozygosity was 119.5 and the number of analyzed SNPs was 425.

| INDV   | O (HOM) | O (HET) | F        |
|--------|---------|---------|----------|
| JAL202 | 296     | 129     | -0.07958 |
| JAL203 | 312     | 113     | 0.05432  |
| JAL204 | 288     | 137     | -0.14653 |
| JAL205 | 302     | 123     | -0.02936 |
| PAR206 | 338     | 87      | 0.27191  |
| PAR207 | 349     | 76      | 0.36397  |
| PAR208 | 328     | 97      | 0.18822  |
| PAR209 | 342     | 83      | 0.30539  |
| PAR210 | 278     | 147     | -0.23022 |
| CAN211 | 286     | 139     | -0.16327 |
| MO226  | 304     | 121     | -0.01263 |
| MO227  | 303     | 122     | -0.02100 |
| CAN228 | 284     | 141     | -0.18000 |
| JAL229 | 312     | 113     | 0.05432  |
| MO230  | 128     | 297     | -1.48554 |
| MO231  | 321     | 104     | 0.12964  |
| MO232  | 251     | 174     | -0.45617 |
| MO233  | 297     | 128     | -0.07121 |
| JAL234 | 302     | 123     | -0.02936 |
| CAN235 | 279     | 146     | -0.22185 |
| JAL236 | 317     | 108     | 0.09617  |
| CAN237 | 292     | 133     | -0.11305 |

|        |     |     |          |
|--------|-----|-----|----------|
| MO238  | 264 | 161 | -0.34738 |
| CAN239 | 302 | 123 | -0.02936 |
| MO240  | 298 | 127 | -0.06284 |
| MO241  | 228 | 197 | -0.64866 |
| CAN242 | 292 | 133 | -0.11305 |
| CAN243 | 299 | 126 | -0.05447 |
| MO244  | 322 | 103 | 0.13801  |
| MO245  | 342 | 83  | 0.30539  |
| MO246  | 278 | 147 | -0.23022 |
| MO247  | 299 | 126 | -0.05447 |
| MO248  | 312 | 113 | 0.05432  |
| MO249  | 329 | 96  | 0.19659  |
| MO250  | 162 | 263 | -1.20100 |
| MO251  | 338 | 87  | 0.27191  |
| MO252  | 202 | 223 | -0.86625 |
| MO253  | 319 | 106 | 0.11291  |
| MO254  | 326 | 99  | 0.17149  |
| MO255  | 273 | 152 | -0.27206 |
| MO256  | 315 | 110 | 0.07943  |
| MO257  | 347 | 78  | 0.34723  |
| MO258  | 310 | 115 | 0.03759  |
| MO259  | 344 | 81  | 0.32213  |
| MO260  | 307 | 118 | 0.01248  |
| MO261  | 285 | 140 | -0.17163 |

---

## **ddRAD Library Assembly Protocol**

This protocol is adapted from Thrasher et al. (2017) and Peterson et al. (2012). The digestion enzymes used were *Sbf*I and *Msp*I. The adapter annealing process was performed according to the protocol by Thrasher et al (2017).

### **DNA extraction**

The first step in the library assembly process is DNA extraction. The extraction protocols can be varied (Kits, Phenol-Chloroform, etc.) as long as the DNA obtained is of high quality.

The verification of the DNA quality must be done in the Nanodrop where the absorbance curves 260/280 must have a value greater than or equal to 1.75 and 260/230 must have a value greater than or equal to 1.80. The quantification must be done in Qubit™ (Thermo Fisher), DNA concentration values greater than or equal to 30 ng/ul are expected. The verification of the integrity of the DNA must be done in an agarose gel electrophoresis, where samples that present smearing (a signal of degraded DNA) must be discarded. After all these processes, the amount of genomic DNA must be normalized to the same concentration for all samples (30 ng/ul).

### **Double digestion**

To calculate the DNA amount of each sample that we will be used in the library construction, we will consider the quantification found in the previous step, if your sample was stored and quantified for a long time, it is recommended that you redo the quantification.

We should use approximately 500 ng of genomic DNA per reaction. The DNA volume must be a maximum of 17  $\mu$ l, if a lower volume is placed, we must add H<sub>2</sub>O until reaching the volume of 17  $\mu$ l.

The restriction enzyme digestion reaction can be done in 96-well plates or in individual Eppendorf tubes (0.8 ml) and should be done according to the table below. A mix can be made with the reagents, except for the genomic DNA, which can then be aliquoted in each well, according to the necessary volumes.

| Reagent                         | Volume for 1 sample ( $\mu$ L) |
|---------------------------------|--------------------------------|
| Restriction enzyme <i>Sbf</i> I | 0.5 (10 units)                 |
| Restriction enzyme <i>Msp</i> I | 0.5 (10 units)                 |
| Cutsmart buffer (10x)           | 2.0                            |
| Genomic DNA                     | 17                             |
| <b>Total Volume</b>             | <b>20</b>                      |

### Steps



- Working on ice, add 3 ul of the mix (buffer + restriction enzymes) to each well of the 96-well plate (the number of wells you will use depends on the number of samples you will place in your library assembly).
- Load the appropriate DNA volume according to the quantification of each sample
- Seal the plate with the specific sealant (make sure it is well sealed to avoid evaporation).
- Vortex the plate for 6 to 10 seconds and centrifuge briefly at approximately 800 rpm.
- Place the plate in the thermal cycler for 5h at 37°C, then refrigerate at 4°C overnight.
- Run an agarose gel electrophoresis to check digestion with 1 ul of reaction. At this stage, we expect to observe a smearing on the gel showing restriction digested DNA products of smaller sizes.

#### Cleanup of digested DNA with magnetic beads

- Remove the beads from the refrigerator and leave them at room temperature and vortex them well before use.
- Add 1.5 x volume of the beads to the digested DNA sample.
- Mix the beads and the sample, gently with the pipette (about 10x) to make the solution homogeneous.

- Let the beads act for 10 minutes.
- Place the plate on the magnetic rack and leave until the liquid becomes clear.
- Without removing the plate from the magnetic rack, remove the liquid with the pipette (about 40 ul) and discard.
- Without removing the plate from the magnetic rack, wash twice with 200 ul of 70% ethanol (use fresh ethanol, do not use old preparations).  
In the second wash, completely remove the liquid, always remembering to use the opposite side of pipette tip to the side where the beads stick.
- Allow the plate to dry for 5 to 10 minutes without removing the plate from the magnetic rack.
- Remove the plate from the magnetic rack.
- Resuspend the beads in 50 ul of ultrapure H<sub>2</sub>O, mixing well.
- Let the beads acting for 5 min.
- Return the plate to the magnetic rack, wait for the beads to stick together again and the liquid to become clear.
- Transfer 40 ul of the liquid without the beads to another plate.
- Discard the plate with the beads.

- Quantify the concentrations of the clean product using 2 ul of digested DNA in the Qubit (dsDNA BR kit). These concentrations will be used to calculate volumes to perform the binding of adapters.

## Ligation of Adapters

In this step, we will connect the adapters (oligonucleotides), which were previously “annulled” according to the protocol by Thrasher et al. (2017), and the samples already digested. So that there is no imbalance between the amount of DNA of each individual sample, the same concentration of DNA must be used for each of the samples in the library. Put 70 ng of DNA from each sample/individual in the ligation reactions, which must be done according to the table below.

| Reagent                                 | Volume for 1 sample (uL)              |
|-----------------------------------------|---------------------------------------|
| Barcode P1 (unique tag for each sample) | 2.0 (Trasher et al. 2017)             |
| T4 DNA ligase                           | 1.25 (500 units)                      |
| Buffer T4                               | 4.0                                   |
| P2 adapter                              | 2.5 (Trasher et al. 2017)             |
| H <sub>2</sub> O                        | Add for a total 40 ul volume          |
| DNA                                     | Depends on digested DNA concentration |

|                     |           |
|---------------------|-----------|
| <b>Total volume</b> | <b>40</b> |
|---------------------|-----------|

- To make it easier, a mix can be made with T4 DNA ligase, buffer and P2 adapter.
- Always work on ice.
- Put the H<sub>2</sub>O in each well/tube first, then the DNA, the P1 barcode and lastly the mix, which must be kept in the freezer until it is aliquoted in the well.
- Seal the plate with the specific sealant (make sure it is well sealed to avoid evaporation).
- Vortex the plate for 6 to 10 seconds and centrifuge briefly at approximately 800 rpm.
- Place the plate in the thermal cycler to run the ligation reaction for 2h at 23°C, then inactivate the enzyme by keeping the temperature at 65°C for 10 min.

After heat inactivation cool at 2°C for 90 seconds, keep at room temperature.

#### *Cleaning ligated DNA with magnetic beads*

- Remove the beads from the refrigerator and leave them at room temperature.

- Combine the ligation products for each index group that will be used in a 2 ml tube. For example, if you digested 40 samples with only 20 unique barcodes, each set of 20 samples linked with their respective barcodes must be associated with 1 different index (1 tube of 2 ml for each index). In this step you will have 800 ul (40 ul x 20) in each tube.
- Vortex beads well before use.
- Add 1.5x the ligation reaction sample volume of beads (In the case of the above example, you would add 1.2 ml of beads to each tube containing 800 ul of ligation product.
- Mix the beads and the sample, gently with the pipette (about 10x) to make the solution very homogeneous.
- Let the beads act for 10 minutes at room temperature.
- Place the tubes on the magnetic rack and leave until the liquid becomes clear.
- Without removing the tubes from the magnetic rack, remove the liquid with the pipette and discard.
- Without removing the tubes from the magnetic rack, wash twice with 2 ml of 70% ethanol (use fresh ethanol, do not use old preparations). In the second wash, completely remove the liquid, always remembering to use the pipette tip in the opposite side where the beads stick.
- Leave the tubes to dry for 5 to 10 minutes without removing them from the magnetic rack.
- Remove the tubes from the magnetic rack.

- Resuspend beads in 36 ul of Buffer AE (10 mM Tris-Cl, 0.5 mM EDTA; pH 9.0 - Qiagen). Repeatedly pipette over the side of the tube to resuspend all beads and wash them in the suspension.
- Incubate at room temperature for 5 min.
- Return the tubes to the magnetic rack and wait for the beads to stick together again and the liquid to become clear.
- Transfer 34 ul of the supernatant to a new tube.
- Discard the tubes that were left with the beads.
- Determine DNA concentrations using 2 ul of clean ligated DNA in Qubit (dsDNA BR kit). The concentrations must be above 50 ng/ul.

### Fragment Selection

The selection of fragments should be done in Pippin Prep (Sage Science) in the range of 450-600 bp. For a more accurate selection, the 2% agarose cassettes are recommended. The fragment selection process is done according to the Pippin Prep user manual.

**Low cycle PCR to add the indices.**

To calculate the concentrations and volume of ligated DNA in the next reaction we must quantify the DNA after the size selection performed in Pippin Prep. The quantification must be performed in the Qubit with the dsDNA HS kit and concentration must be around 1 ng/ul.

We will use 10 ng of size selected DNA per PCR reaction. Considering that, after Pippin Prep, we will have 30 ul of final volume and that the quantification was 1 ng/ul, we will prepare three PCR reactions, as shown in the table below.

| Reagent                        | Volume (ul) for 1 reaction | Volume (ul) for 3 reactions |
|--------------------------------|----------------------------|-----------------------------|
| Ligated and size-selected DNA  | 10                         | 30                          |
| Phusion Master Mix (2X)        | 12.5                       | 37.5                        |
| Primer P1_PCR_for index (5 uM) | 1.25                       | 3.75                        |
| Index_primer (*P_Index         | 1.25                       | 3.75                        |
| <b>Total volume</b>            | <b>25 ul</b>               | <b>75 ul</b>                |

A different index\_primer must be used for each of the groups of samples formed during the cleaning step, after connecting the adapters. Once the reactions have been done place the tubes in the thermocycler according to the program below.

- 98°C for 30 sec.

- 12 cycles of:
  - 98°C for 5 sec.
  - 60°C for 25 sec.
  - 72°C for 10 sec.
- 72°C for 5 min.
- 10° for 10min

Note: Even if the concentration before the PCR is below the recommended level, the number of cycles should not be increased, as this could lead to a substantial increase (>1%) of incorrect incorporation of bases.

#### Verification on the agarose gel electrophoresis

- Place the PCR reactions from the same group in the same 1.5 ml tube.
- Take 5 ul and run it on a 1 or 2% agarose gel electrophoresis.
- At this stage a band between 500 and 600 bp should be visible, but it may be a very weak band.



### Post-PCR DNA Cleanup with Magnetic Beads

- Remove the beads from the refrigerator and leave them at room temperature.
- Vortex beads well before use.
- Add 0.8x the bead sample volume.
- Mix the beads and the sample, gently with the pipette (about 10x) to make the solution homogeneous.
- Let the beads act for 10 minutes.
- Place the tubes on the magnetic rack and leave until the liquid becomes clear.
- Without removing the tubes from the magnetic rack, remove the liquid with the pipette and discard.
- Without removing the tubes from the magnetic rack, wash with 500 ul of 70% ethanol (use fresh ethanol, do not use old preparations).
- Wait 2 minutes and remove all ethanol.
- Repeat the last three steps and in the last step remove as much ethanol as possible.
- Leave the tubes to dry for 5 to 10 minutes without removing them from the magnetic rack.

- Remove the tubes from the magnetic rack.
- Resuspend beads in 36 ul of Buffer AE. Repeatedly pipette over the side of the tube to resuspend all beads and wash them in the suspension.
- Incubate at room temperature for 5 min.
- Return the tubes to the magnetic rack and wait for the beads to stick together again and the liquid to become clear.
- Transfer 34 ul of the supernatant to a new tube.
- Discard the tubes that were left with the beads.
- Determine DNA concentration, post-PCR, using 2 ul of cleaned DNA (dsDNA HS kit Qubit). Concentrations may be low but should have increased from pre-PCR quantitation post Pippin Prep size selection.

Post-PCR samples are now ready for pool assembly and submitted to Illumina short read sequencing. If the post-PCR quantifications are too low, the DNA can be concentrated using a vacuum centrifuge. The running time in the centrifuge depends on the final volume of the library and on what is the minimum volume required to undergo sequencing.

The library should be quantified using the KAPA Library Quantification Kit (Roche), following the recommendations in the kit's guide for use.

Once all previous steps have been successfully performed, the library can now be submitted to sequencing.
